# Supplementary material
Source: PubMed Central journal article supplement (PMC1891215)

**CK20**

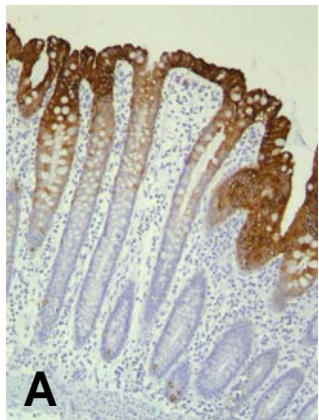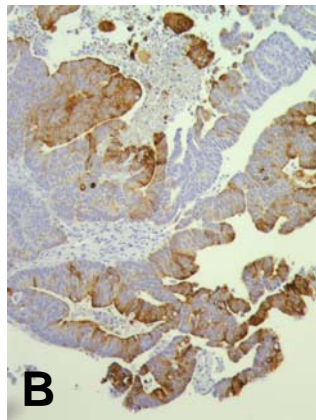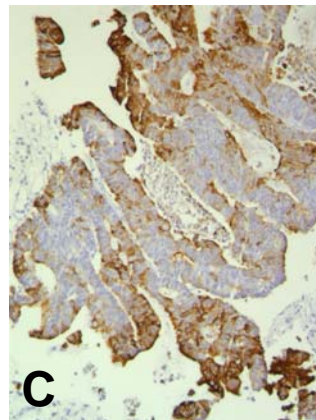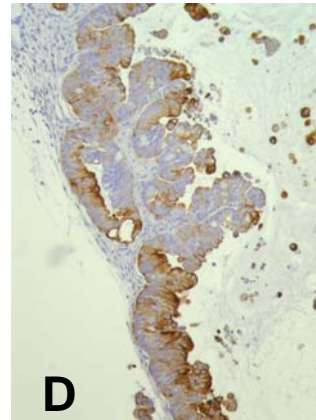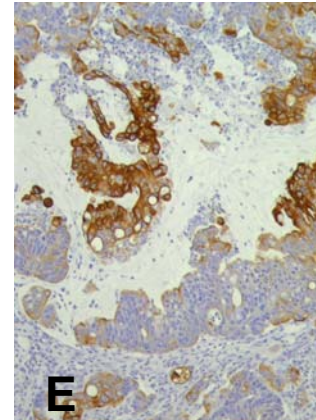

**Muc**

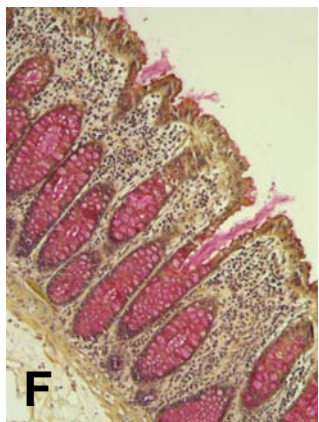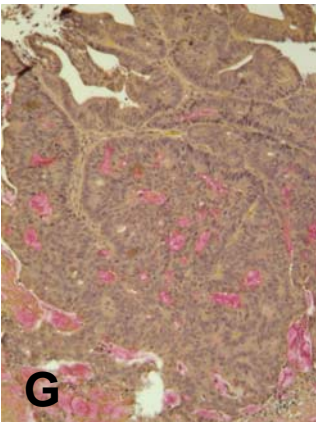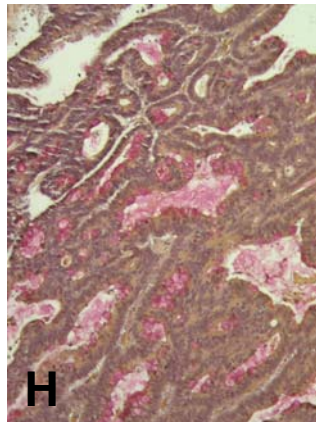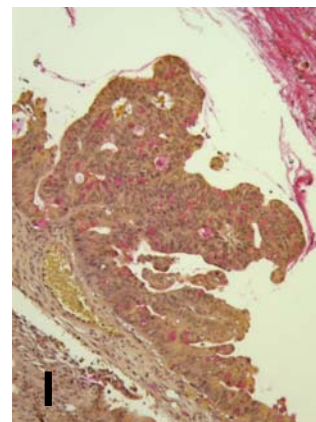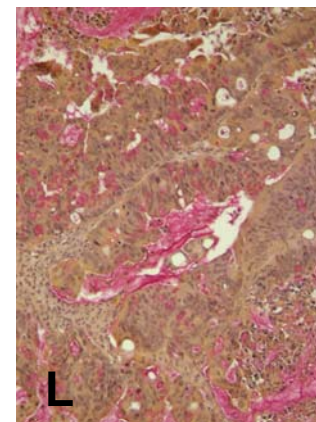

**Normal  
epithelium**

**UM#4  
[xeno]**

**UM#4  
[EpCAM/CD44]**

**MIC69  
[xeno]**

**MIC69  
[EpCAM/CD44]**

Supplement: pnas_0703478104_1.pdf [file pnas_0703478104_1.pdf]

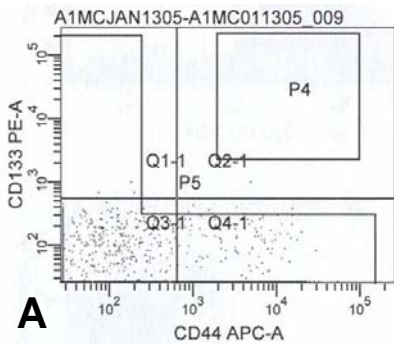

**UM-COLON#4**

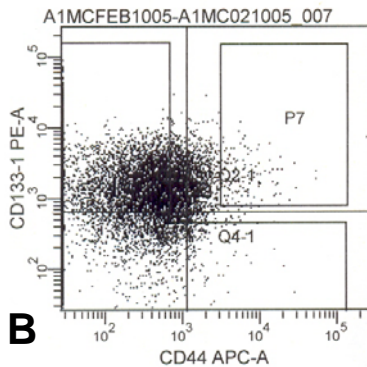

**UM-COLON#6**

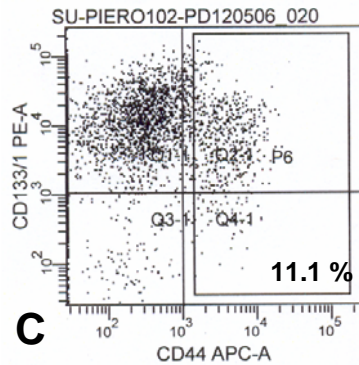

**UM-COLON#21**

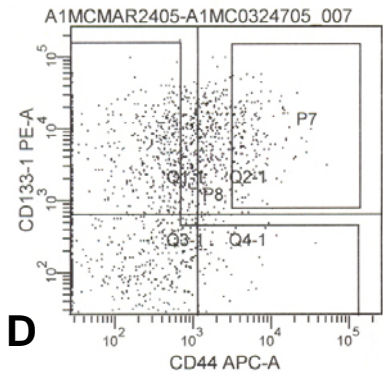

**MICOL-69**

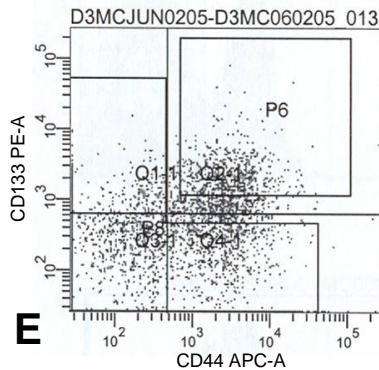

**UM-COLON#8**

Supplement: pnas_0703478104_6.pdf [file pnas_0703478104_6.pdf]

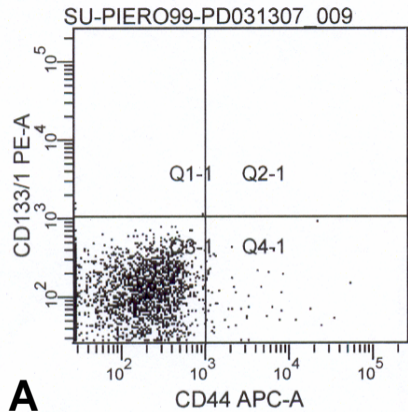

**A**

**primary**

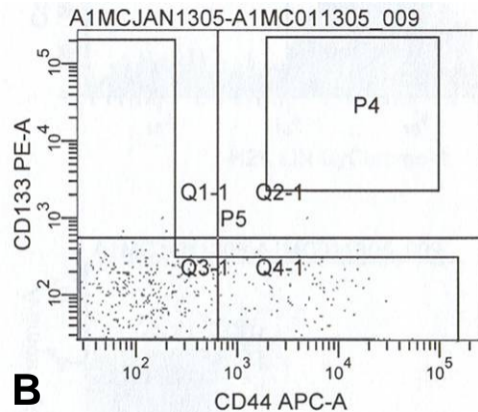

**B**

**m2**

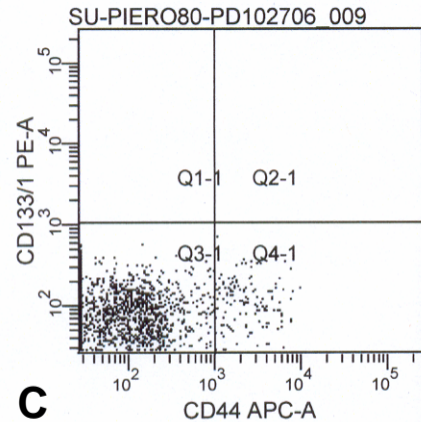

**C**

**m4**

Supplement: pnas_0703478104_7.pdf [file pnas_0703478104_7.pdf]
